# Supplementary material for: Development of a Coaching Program on Leadership for Selected Personnel in a Healthcare Environment
Source: Research Square preprint supplement (doi:10.21203/rs.3.rs-7505962/v1), 2025-10-21
Supplement: Supplementary file 1 [file 09b50bcefb2c785e32c8e180.docx]

Development of a Coaching Program on Leadership for

Selected Personnel in a Healthcare Environment

**PART I: Current Levels of Self-Awareness, Knowledge, Behavior, and Leadership Skills**

**Instructions:** For each statement, indicate how frequently you engage in the behavior or how true the statement is for you using the scale provided.

**Likert Scale:**

- 1 - Never
- 2 - Rarely
- 3 - Sometimes
- 4 - Often
- 5 – Always

**Self-Awareness**

| **Statement** | **1-Never** | **2- Rarely** | **3- Sometimes** | **4- Often** | **5– Always** |
| --- | --- | --- | --- | --- | --- |
| 1. I am aware of my strengths as a leader. |  |  |  |  |  |
| 2. I am aware of my weaknesses as a leader. |  |  |  |  |  |
| 3. I regularly reflect on my leadership experiences and learn from them. |  |  |  |  |  |
| 4. I understand how my emotions impact my leadership effectiveness. |  |  |  |  |  |
| 5. I am aware of how my behavior influences my team’s performance. |  |  |  |  |  |
| 6. I openly seek feedback from colleagues to improve my leadership skills and styles. |  |  |  |  |  |
| 7. I regularly assess my leadership goals and progress. |  |  |  |  |  |
| 8. I am mindful of how my decision-making process affects others. |  |  |  |  |  |
| 9. I am able to inspire my colleagues to do their tasks well. |  |  |  |  |  |
| 10. I serve as a good role model for others. |  |  |  |  |  |

**Knowledge**

| **Statement** | **1-Never** | **2- Rarely** | **3- Sometimes** | **4- Often** | **5– Always** |
| --- | --- | --- | --- | --- | --- |
| 1. I am quite informed about various leadership theories and models. |  |  |  |  |  |
| 2. I understand the key principles of effective leadership. |  |  |  |  |  |
| 3. I am aware of the latest trends and best practices in leadership. |  |  |  |  |  |
| 4. I can identify the leadership styles that are most effective in different situations. |  |  |  |  |  |
| 5. I have a clear understanding of the roles and responsibilities of a leader. |  |  |  |  |  |
| 6. I am familiar with strategies for motivating and inspiring a team. |  |  |  |  |  |
| 7. I understand the importance of ethical leadership. |  |  |  |  |  |
| 8. I am updated about conflict resolution techniques. |  |  |  |  |  |
| 9. I have a solid grasp of how to manage change within an organization. |  |  |  |  |  |
| 10. I understand the importance of continuous learning and development in leadership. |  |  |  |  |  |

**Behavior**

| **Statement** | **1-Never** | **2- Rarely** | **3- Sometimes** | **4- Often** | **5– Always** |
| --- | --- | --- | --- | --- | --- |
| 1. I find time to listen to group  members. |  |  |  |  |  |
| 2. I look out for the personal  welfare of every individual in the group |  |  |  |  |  |
| 3. I assign group members to  particular tasks. |  |  |  |  |  |
| 4. I keep the group informed. |  |  |  |  |  |
| 5. I am willing to make changes. |  |  |  |  |  |
| 6. I make sure that my part in the  organization is understood by  group members. |  |  |  |  |  |
| 7. I make group members feel at  ease when I am talking with them. |  |  |  |  |  |
| 8. I put suggestions made by the  group into action. |  |  |  |  |  |
| 9. I see to it that group members  are working up to capacity. |  |  |  |  |  |
| 10. I get group approval in  important matters before going  ahead. |  |  |  |  |  |

**Leadership Skills**

| **Statement** | **1-Never** | **2- Rarely** | **3- Sometimes** | **4- Often** | **5– Always** |
| --- | --- | --- | --- | --- | --- |
| 1. I make my expectations clear to the group. |  |  |  |  |  |
| 2. I take the lead in group activities. |  |  |  |  |  |
| 3. I communicate clearly and effectively. |  |  |  |  |  |
| 4. I provide feedback on poor performance. |  |  |  |  |  |
| 5. I enforce consistent standards of performance. |  |  |  |  |  |
| 6. I treat all group members equally. |  |  |  |  |  |
| 7. I keep the group working together as a team. |  |  |  |  |  |
| 8. I am able to sense the emotional tensions in my group. |  |  |  |  |  |
| 9. I can see the big picture (underlying situation in our workplace. |  |  |  |  |  |
| 10. I am effective at obtaining resources to support our programs. |  |  |  |  |  |

**PART II: Changes in Self-Awareness, Knowledge, and Leadership Behavior After the Coaching Program**

**Instructions:** Reflect on the coaching program you participated in. For each statement, indicate how much change you have experienced in the behavior or area since the program using the scale provided.

**Likert Scale:**

- 1 - Much Decreased
- 2 - Decreased
- 3 - No Change
- 4 - Increased
- 5 - Much Increased

**Self-Awareness**

| **Statement** | **1-Much Decreased** | **2-Decreased** | **3-No Change** | **4-Increased** | **5-Much Increased** |
| --- | --- | --- | --- | --- | --- |
| 1. My awareness of my strengths as a leader has... |  |  |  |  |  |
| 2. My awareness of my weaknesses as a leader has... |  |  |  |  |  |
| 3. My frequency of reflecting on my leadership experiences has... |  |  |  |  |  |
| 4. My understanding of how my emotions impact my leadership effectiveness has... |  |  |  |  |  |
| 5. My awareness of how my behavior influences my team’s performance has... |  |  |  |  |  |
| 6. My openness to seeking feedback from colleagues has... |  |  |  |  |  |
| 7. My regular assessment of my leadership goals and progress has... |  |  |  |  |  |
| 8. My mindfulness of how my decision-making process affects others has... |  |  |  |  |  |
| 9. My ability to inspire my colleagues to do their tasks well has... |  |  |  |  |  |
| 10. My role modeling for others has... |  |  |  |  |  |

**Knowledge**

| **Statement** | **1-Much Decreased** | **2-Decreased** | **3-No Change** | **4-Increased** | **5-Much Increased** |
| --- | --- | --- | --- | --- | --- |
| 1. My knowledge about various leadership theories and models has... |  |  |  |  |  |
| 2. My understanding of the key principles of effective leadership has... |  |  |  |  |  |
| 3. My awareness of the latest trends and best practices in leadership has... |  |  |  |  |  |
| 4. My ability to identify the most effective leadership styles in different situations has... |  |  |  |  |  |
| 5. My understanding of the roles and responsibilities of a leader has... |  |  |  |  |  |
| 6. My familiarity with strategies for motivating and inspiring a team has... |  |  |  |  |  |
| 7. My understanding of the importance of ethical leadership has... |  |  |  |  |  |
| 8. My knowledge of conflict resolution techniques has... |  |  |  |  |  |
| 9. My understanding of how to manage change within an organization has... |  |  |  |  |  |
| 10. My appreciation of the importance of continuous learning and development in leadership has... |  |  |  |  |  |

**Behavior**

| **Statement** | **1-Much Decreased** | **2-Decreased** | **3-No Change** | **4-Increased** | **5-Much Increased** |
| --- | --- | --- | --- | --- | --- |
| 1. My ability to find time to listen to group members has… |  |  |  |  |  |
| 2. My attention to the personal welfare of every individual in the group has... |  |  |  |  |  |
| 3. My ability to assign group members to particular tasks has... |  |  |  |  |  |
| 4. My efforts to keep the group informed have... |  |  |  |  |  |
| 5. My willingness to make changes has... |  |  |  |  |  |
| 6. My ability to ensure that my part in the organization is understood by group members has... |  |  |  |  |  |
| 7. My approach in making group members feel at ease when talking with them has... |  |  |  |  |  |
| 8. My efforts to put group suggestions into action have... |  |  |  |  |  |
| 9. My oversight in ensuring that group members are working up to capacity has... |  |  |  |  |  |
| 10. My consideration of group approval in important matters before proceeding has... |  |  |  |  |  |

**Leadership Skills**

| **Statement** | **1-Much Decreased** | **2-Decreased** | **3-No Change** | **4-Increased** | **5-Much Increased** |
| --- | --- | --- | --- | --- | --- |
| 1. My clarity in setting expectations for the group has... |  |  |  |  |  |
| 2. My ability to take the lead in group activities has... |  |  |  |  |  |
| 3. My effectiveness in communicating clearly has... |  |  |  |  |  |
| 4. My frequency of providing feedback on poor performance has... |  |  |  |  |  |
| 5. My consistency in enforcing standards of performance has... |  |  |  |  |  |
| 6. My fairness in treating all group members equally has... |  |  |  |  |  |
| 7. My ability to keep the group working together as a team has... |  |  |  |  |  |
| 8. My sensitivity to the emotional tensions in my group has... |  |  |  |  |  |
| 9. My ability to see the big picture (underlying situation in our workplace) has... |  |  |  |  |  |
| 10. My effectiveness in obtaining resources to support our programs has... |  |  |  |  |  |

**PART III: Effectiveness of the Coaching Program in Achieving Objectives and Improving Leadership Performance**

**Instructions:** Evaluate the effectiveness of the coaching program in terms of its impact on your performance and development. Use the scale provided.

**Likert Scale:**

- 1 - Strongly Disagree
- 2 - Disagree
- 3 - Neutral
- 4 - Agree
- 5 - Strongly Agree

**Effectiveness**

| **Statement** | **1-Strongly Disagree** | **2-Disagree** | **3-Neutral** | **4-Agree** | **5-Strongly Agree** |
| --- | --- | --- | --- | --- | --- |
| 1. The coaching program has helped me achieve my leadership development goals. |  |  |  |  |  |
| 2. The coaching sessions have been effective in enhancing my leadership skills. |  |  |  |  |  |
| 3. The coaching program has positively impacted my performance as a leader. |  |  |  |  |  |
| 4. The coaching program has improved my ability to lead my team effectively. |  |  |  |  |  |
| 5. The feedback received during coaching was constructive and helpful. |  |  |  |  |  |
| 6. The coaching program has increased my confidence in my leadership abilities. |  |  |  |  |  |
| 7. The program has contributed to my personal growth. |  |  |  |  |  |
| 8. The program has contributed to my professional growth. |  |  |  |  |  |

**Program Structure and Delivery**

| **Statement** | **1-Strongly Disagree** | **2-Disagree** | **3-Neutral** | **4-Agree** | **5-Strongly Agree** |
| --- | --- | --- | --- | --- | --- |
| 9. The objectives of the coaching program were clearly communicated and met. |  |  |  |  |  |
| 10. The coaching program was well-structured and delivered effectively. |  |  |  |  |  |
| 11. The materials provided during the coaching sessions were helpful and relevant. |  |  |  |  |  |
| 12. The coaching sessions were scheduled at convenient times. |  |  |  |  |  |
| 13. The duration of each coaching session was appropriate. |  |  |  |  |  |
| 14. The facilitator/coach was knowledgeable and effective in delivering the content. |  |  |  |  |  |
| 15. The environment in which the coaching took place was conducive to learning. |  |  |  |  |  |
